# Supplementary material for: Exposures to fruit plants in Germany from 2010–2019: Analysis of the Erfurt joint poison information center database
Source: Bundesgesundheitsblatt Gesundheitsforschung Gesundheitsschutz. 2023 Oct 12;66(12):1423–33. [Article in German] doi: 10.1007/s00103-023-03780-7 (PMC10667429; doi:10.1007/s00103-023-03780-7)
Supplement: Supplementary file 1 [file 103_2023_3780_MOESM1_ESM.pdf]

## Onlinematerial zum Beitrag von Wendt et al. (Bundesgesundheitsblatt Heft 12/2023)

### Modifizierter Poisoning Severity Score (PSS) zur Beurteilung der Vergiftungsschwere am GGIZ Erfurt [11, 16]

| Organsystem                  | Symptomschwere angelehnt an den Poisoning Severity Score                   |                                                                                                                                                                                                       |                                                                                                                                                                                                                                                |                                                                                                                                                                                                                                                                                |                                                         |
|------------------------------|----------------------------------------------------------------------------|-------------------------------------------------------------------------------------------------------------------------------------------------------------------------------------------------------|------------------------------------------------------------------------------------------------------------------------------------------------------------------------------------------------------------------------------------------------|--------------------------------------------------------------------------------------------------------------------------------------------------------------------------------------------------------------------------------------------------------------------------------|---------------------------------------------------------|
|                              | symptomlos                                                                 | leicht                                                                                                                                                                                                | mild                                                                                                                                                                                                                                           | schwer                                                                                                                                                                                                                                                                         | verstorben                                              |
|                              | Keine Symptome oder Anzeichen im Zusammenhang mit einer Pflanzenvergiftung | Leichte, vorübergehende und spontan zurückgehende Symptome im Zusammenhang mit einer Pflanzenvergiftung                                                                                               | Ausgeprägte oder anhaltende Symptome im Zusammenhang mit einer Pflanzenvergiftung                                                                                                                                                              | Schwere oder lebensbedrohliche Symptome im Zusammenhang mit einer Pflanzenvergiftung                                                                                                                                                                                           | Todesfolge im Zusammenhang mit einer Pflanzenvergiftung |
|                              | 0                                                                          | 1                                                                                                                                                                                                     | 2                                                                                                                                                                                                                                              | 3                                                                                                                                                                                                                                                                              | 4                                                       |
| <b>Gastrointestinaltrakt</b> | Symptomlosigkeit                                                           | <ul style="list-style-type: none"> <li>Bauchschmerz, Erbrechen, Durchfall,</li> <li>Schleimhautreizung (1° Verätzung), Aphthen im Mund</li> <li>endoskopisch: Schleimhautrötung Schwellung</li> </ul> | <ul style="list-style-type: none"> <li>Erbrechen Bauchschmerzen, Durchfall, länger als 2 Stunden anhaltend</li> <li>2° oder 3° Verätzung in kleinem Schleimhautbereich</li> <li>leichte Schluckstörung</li> <li>endoskopisch: Ulkus</li> </ul> | <ul style="list-style-type: none"> <li>starkes Bluterbrechen, Perforation</li> <li>2° oder 3° Verätzung in größerem Schleimhautbereich</li> <li>schwere Schluckstörung</li> <li>endoskopisch: tiefes Ulkus, zirkumferente Läsion, Perforation</li> </ul>                       | Tod                                                     |
| <b>Respirationstrakt</b>     |                                                                            | <ul style="list-style-type: none"> <li>Reizgefühl, Husten, Kurzatmigkeit, leichte Atemnot, gering gradiger Bronchospasmus</li> <li>auffälliger Röntgen-Thorax-Befund ohne Beschwerden</li> </ul>      | <ul style="list-style-type: none"> <li>anhaltender Husten, Bronchospasmus, Atemnot, Stridor</li> <li>reduzierte Sauerstoffsättigung</li> <li>auffälliger Röntgen-Thorax-Befund mit leichten/mäßigen Beschwerden</li> </ul>                     | <ul style="list-style-type: none"> <li>manifeste Ateminsuffizienz (z. B. schwerer Bronchospasmus, Atemwegsverlegung, Glottisödem, Lungenödem, Atemnotsyndrom (ARDS), Pneumonitis, Pneumothorax)</li> <li>auffälliger Röntgen- Thorax-Befund mit starken Beschwerden</li> </ul> |                                                         |
| <b>Nervensystem</b>          |                                                                            | <ul style="list-style-type: none"> <li>Benommenheit, Schwindel, Ohrgeräusch, innere Unruhe</li> <li>Ataxie, leichte extrapyramidal-</li> </ul>                                                        | <ul style="list-style-type: none"> <li>Bewusstlosigkeit mit gezielter Reaktion auf Schmerzreize</li> <li>kurzer Atemstillstand verlangsamte Atmung</li> <li>Verwirrtheit, Agitiertheit, Halluzination, Delir</li> </ul>                        | <ul style="list-style-type: none"> <li>Bewusstlosigkeit ohne oder mit ungezielter Reaktion auf Schmerzreize</li> <li>Atemantriebsstörung</li> <li>starke Agitiertheit</li> </ul>                                                                                               |                                                         |

|                              |  |                                                                                                                                             |                                                                                                                                                                                                                                                                                                                                                                                                                             |                                                                                                                                                                                                                                                                                                                              |  |
|------------------------------|--|---------------------------------------------------------------------------------------------------------------------------------------------|-----------------------------------------------------------------------------------------------------------------------------------------------------------------------------------------------------------------------------------------------------------------------------------------------------------------------------------------------------------------------------------------------------------------------------|------------------------------------------------------------------------------------------------------------------------------------------------------------------------------------------------------------------------------------------------------------------------------------------------------------------------------|--|
|                              |  | motorische Bewegungsstörungen<br>• leichte cholinerge oder anticholinergere Symptome<br>• Missempfinden<br>• leichte Seh- oder Hörstörungen | • Krampfanfälle (lokal oder generalisiert)<br>• starke extrapyramidal-motorische Bewegungsstörungen<br>• starke cholinerge oder anticholinergere Symptome<br>• umschriebene, nicht lebensbedrohliche Muskellähmung<br>• starke Seh- oder Hörstörungen                                                                                                                                                                       | • häufige Krampfanfälle oder <i>Status epilepticus</i> , Opisthotonus<br>• generalisierte oder lebensbedrohliche Muskellähmung<br>• Erblindung oder Taubheit                                                                                                                                                                 |  |
| <b>Herz-Kreislauf-System</b> |  | • isolierte Extrasystolen<br>• leichter oder kurzzeitiger Blutdruckanstieg oder Blutdruckabfall                                             | • mäßige Sinusbradykardie (Erw.: 40-50/min, Kinder: 60-80/min, Neugeborene: 80-90/min)<br>• mäßige Sinustachykardie (Erw.: 140-180/min, Kinder: 160-190/min, Neugeborene: 160-200/min)<br>• häufige Extrasystolen, Vorhofflattern oder -flimmern<br>• AV-Block 1-2°<br>• verbreiteter QRS-Komplex oder verlängerte QT-Zeit/Repolarisationsstörungen<br>• Myokardischämie<br>• starker Blutdruckanstieg oder Blutdruckabfall | • schwere Sinusbradykardie (Erw.: <40/min, Kinder: <60/min, Neugeborene: <80/min)<br>• starke Sinustachykardie (Erw.: >180/min, Kinder: >190/min, Neugeborene: >200/min)<br>• lebensbedrohliche Herzrhythmusstörungen,<br>• AV-Block 3°<br>• Herzstillstand<br>• Myokardinfarkt<br>• Kreislaufschock<br>• hypertensive Krise |  |
| <b>Niere</b>                 |  | • minimale Proteinurie/Hämaturie                                                                                                            | • massive Proteinurie/Hämaturie<br>• Nierenfunktionsstörung (z.B. Oligurie, Polyurie<br>Serumkreatinin von ~200-500 µmol/L)                                                                                                                                                                                                                                                                                                 | • Nierenversagen (z.B. Anurie, Serumkreatinin von >500 µmol/L)                                                                                                                                                                                                                                                               |  |
| <b>Leber</b>                 |  | • minimaler Anstieg der Transaminasen (ASAT, ALAT ~2-5 x normal)                                                                            | • deutlicher Anstieg der Transaminasen (ASAT, ALAT ~5-50 x normal)<br>• keine weiteren auffälligen                                                                                                                                                                                                                                                                                                                          | • extremer Anstieg der Transaminasen (>50 x normal)<br>• weitere pathologische                                                                                                                                                                                                                                               |  |

|                     |  |                                                                                                                                                                                                                                                                                                                         |                                                                                                                                                                                                                                                                                                                                                  |                                                                                                                                                                                                                                                                                            |  |
|---------------------|--|-------------------------------------------------------------------------------------------------------------------------------------------------------------------------------------------------------------------------------------------------------------------------------------------------------------------------|--------------------------------------------------------------------------------------------------------------------------------------------------------------------------------------------------------------------------------------------------------------------------------------------------------------------------------------------------|--------------------------------------------------------------------------------------------------------------------------------------------------------------------------------------------------------------------------------------------------------------------------------------------|--|
|                     |  |                                                                                                                                                                                                                                                                                                                         | biochemischen Marker (z. B. Ammoniak, Gerinnungsfaktoren)<br>• keine klinischen Hinweise auf Leberfunktionsstörung                                                                                                                                                                                                                               | biochemische Marker (z. B. Ammoniak, Gerinnungsfaktoren)<br>• klinische Hinweise auf Leberversagen                                                                                                                                                                                         |  |
| <b>Muskulatur</b>   |  | • milder Schmerz, Spannung<br>• CPK ~250-1.500 IU/L                                                                                                                                                                                                                                                                     | • mäßige Schmerzen, Steifheit, Krämpfe, Faszikulationen<br>• Rhabdomyolyse<br>• CPK ~1.500-10.000 IU/L                                                                                                                                                                                                                                           | • starke Schmerzen, extreme Steifheit, generalisierte Krämpfe und Faszikulationen<br>• Rhabdomyolyse mit Komplikationen<br>• CPK >10.000 IU/L<br>• Kompartmentsyndrom                                                                                                                      |  |
| <b>Metabolismus</b> |  | • leichte Säure-Base-Störungen ( $\text{HCO}_3^-$ ~15-20 oder 30-40 mmol/L<br>pH ~7,25-7,32 oder 7,50-7,59)<br>• milde Elektrolyt- u. Flüssigkeitsstörungen ( $\text{K}^+$ 3,0-3,4 oder 5,2-5,9 mmol/L)<br>• leichte Hypoglykämie (~50-70 mg/dL oder 2,8-3,9 mmol/L bei Erwachsenen)<br>• Hyperthermie von kurzer Dauer | • stärker ausgeprägte Säure-Base-Störungen ( $\text{HCO}_3^-$ ~10-14 oder >40 mmol/L; pH ~7,15-7,24 oder 7,60-7,69)<br>• stärker ausgeprägte Elektrolyt- u. Flüssigkeitsstörungen ( $\text{K}^+$ 2,5-2,9 oder 6,0-6,9 mmol/L)<br>• stärkere Hypoglykämie (~30-50 mg/dL oder 1,7-2,8 mmol/L bei Erwachsenen)<br>• Hyperthermie von längerer Dauer | • schwere Säure-Base-Störungen ( $\text{HCO}_3^-$ <10 mmol/L; pH <7,15 oder >7,7)<br>• schwere Elektrolyt- und Flüssigkeitsstörungen ( $\text{K}^+$ <2,5 oder >7,0 mmol/L)<br>• schwere Hypoglykämie (<30 mg/dL oder <1,7 mmol/L bei Erwachsenen)<br>• gefährliche Hypo- oder Hyperthermie |  |
| <b>Blutsystem</b>   |  | • leichte Hämolyse<br>• leichte Methämoglobinämie (MetHb ~10-30%)                                                                                                                                                                                                                                                       | • mäßige Hämolyse<br>• ausgeprägtere Methämoglobinämie (MetHb ~30-50%)<br>• Gerinnungsstörungen ohne Blutung<br>• mäßige Anämie, Leukopenie, Thrombozytopenie                                                                                                                                                                                    | • massive Hämolyse<br>• schwere Methämoglobinämie (MetHb >50%)<br>• Gerinnungsstörungen mit Blutungen<br>• schwere Anämie, Leukopenie, Thrombozytopenie                                                                                                                                    |  |
